# Supplementary material
Source: Research Square preprint supplement (doi:10.21203/rs.3.rs-7631069/v1)
Supplement: Supplementary file 1 [file 90867a23197220782bc5a1d1.docx]

**Table 1. List of basic endoscopic skills**

| 1. Hold the endoscope correctly | 2. Use of knob control | 3. Endoscopic insertion |
| --- | --- | --- |
| 4. Endoscopic propulsion | 5. Endoscopic retraction | 6. Endoscopic turnover |
| 7. Endoscopic torsion | 8. Endoscopic reduction | 9. Taking photos |
| 10. Suction and flushing | 11. Biopsy | 12. Snare polypectomy |
| 13. Use assistive devices while maintaining endoscopic control | | 14. Force feedback control |

**Table 2. Five-point Likert scale**

|  | 1 point | 2 point | 3 point | 4 point | 5 point |
| --- | --- | --- | --- | --- | --- |
| Sufficient understanding of how endoscopic procedures work | Strongly disagree | Disagree | unclear | Agree | Strongly agree |
| Sufficient proficiency in endoscopic procedures | Strongly disagree | Disagree | unclear | Agree | Strongly agree |
| Sufficient familiarity with the use of endoscopic instruments | Strongly disagree | Disagree | unclear | Agree | Strongly agree |
| Sufficient understanding of the structure of gastric anatomy | Strongly disagree | Disagree | unclear | Agree | Strongly agree |
| Already have the confidence to perform clinical endoscopic procedures | Strongly disagree | Disagree | unclear | Agree | Strongly agree |
